# Supplementary material for: Facile electrosynthesis of π-extended porphyrins
Source: Royal Society of Chemistry journal article supplement (doi:10.1039/c4cc02759k), 2014-01-01
Supplement: c4cc02759k1.pdf [file c4cc02759k1.pdf]

**Electronic Supplementary Information**

**for**

**Facile Electrosynthesis of  $\pi$ -Extended Porphyrins**

Yuanyuan Fang, Dominik Koszelewski, Karl M. Kadish, and Daniel T. Gryko

**Table of Contents**

|                                                                            |         |
|----------------------------------------------------------------------------|---------|
| 1 Electrochemical and spectroelectrochemical data                          | S2-S10  |
| 2. Experimental details                                                    | S10-S12 |
| 3. Spectra $^1\text{H}$ and $^{13}\text{C}$ NMR for synthesized porphyrins | S13-S17 |
| 4. Literature                                                              | S17     |

**Table S1. Half-wave or Peak Potentials (V vs SCE) in CH<sub>2</sub>Cl<sub>2</sub>, containing 0.1 M TBAP. Scan rate of 0.1 V/s.**

| M                     | Ring         | Oxidation         |                 | Reduction          |                    | H-L gap (V) |
|-----------------------|--------------|-------------------|-----------------|--------------------|--------------------|-------------|
|                       |              | 2 <sup>nd</sup>   | 1 <sup>st</sup> | 1 <sup>st</sup>    | 2 <sup>nd</sup>    |             |
| <b>H<sub>2</sub></b>  | <b>TMP</b>   | 1.46              | 1.03            | -1.31              | -1.68              | 2.34        |
|                       | <b>Open</b>  | 1.27 <sup>b</sup> | 1.02            | -1.28              | -1.67              | 2.30        |
|                       | <b>Fused</b> | 1.00              | 0.64            | -1.10              | -1.58              | 1.74        |
| <b>Zn</b>             | <b>TMP</b>   | 1.09              | 0.78            | -1.47              | -1.89              | 2.25        |
|                       | <b>Open</b>  | 1.05              | 0.76            | -1.44              | -1.87              | 2.20        |
|                       | <b>Fused</b> | 0.79              | 0.52            | -1.24              | -1.72              | 1.76        |
| <b>Ni<sup>a</sup></b> | <b>TMP</b>   | 1.38 <sup>b</sup> | 1.02            | -1.60 <sup>b</sup> | -                  | 2.62        |
|                       | <b>Open</b>  | 1.15              | 1.02            | -1.47 <sup>b</sup> | -                  | 2.49        |
|                       | <b>Fused</b> | 1.02              | 0.67            | -1.24              | -1.84 <sup>b</sup> | 1.91        |
| <b>InCl</b>           | <b>TMP</b>   | 1.53              | 1.18            | -1.19              | -1.62              | 2.37        |
|                       | <b>Open</b>  | 1.40 <sup>b</sup> | 1.15            | -1.15              | -1.60              | 2.30        |
|                       | <b>Fused</b> | 1.13              | 0.79            | -1.00              | -1.48              | 1.79        |
| <b>IrCOCl</b>         | <b>TMP</b>   | -                 | 1.19            | -1.32 <sup>c</sup> | -1.82              | 2.51        |
|                       | <b>Open</b>  | 1.45 <sup>b</sup> | 1.19            | -1.29              | -1.75              | 2.48        |
|                       | <b>Fused</b> | 0.77              | 0.51            | -1.24              | -1.73              | 1.75        |

<sup>a</sup>Data taken from ref 20, <sup>b</sup>peak potential at a scan rate of 0.1 V/s. <sup>c</sup>coupled with an oxidation process at  $E_{1/2} = -1.49$  V

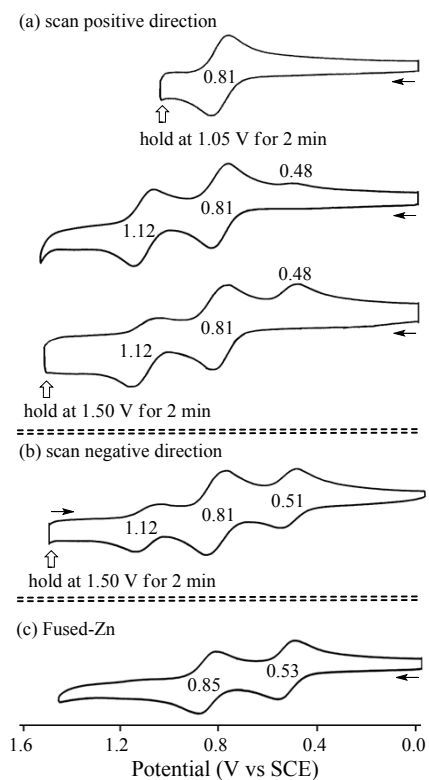

**Figure S1** Cyclic voltammograms showing electrochemically induced generation of the fused Zn(II) complex from the porphyrin bis-radical of the related open macrocycle (a) after initial positive scans from 0.0 to 1.50 V and (b) after an initial negative scan from 1.50 to 0.0 V in PhCN, 0.1 M TBAP, scan rate = 0.1 V/s. For comparison, a cyclic voltammograms of the chemically generated Zn(II) porphyrin with the fused  $\pi$ -extended system is shown in part c.

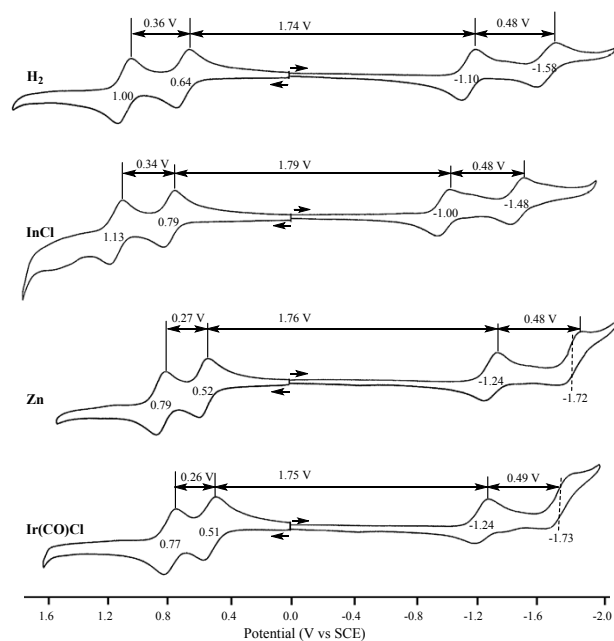

**Figure S2.** Cyclic voltammograms of the chemically synthesized  $\pi$ -extended porphyrins in  $\text{CH}_2\text{Cl}_2$ , 0.1 M TBAP. The  $\Delta E_{1/2}$  between the various redox progresses is also given in the figure.

**Table S2.** UV-vis spectral data of neutral investigated porphyrins in  $\text{CH}_2\text{Cl}_2$ , 0.1 M TBAP.

| Ring  | M              | Soret bands (nm)  |     |     |     | Visible bands (nm) |     |     |     |
|-------|----------------|-------------------|-----|-----|-----|--------------------|-----|-----|-----|
| TMP   | H <sub>2</sub> | 400 <sup>sh</sup> | 418 |     |     | 514                | 547 | 592 | 648 |
|       | Zn             | 400 <sup>sh</sup> | 421 |     |     | 513                | 549 | -   |     |
|       | Ni             | -                 | 415 |     |     | 528                | 561 |     |     |
|       | InCl           | 405 <sup>sh</sup> | 425 |     |     | 561                | 599 | -   |     |
|       | Ir(CO)Cl       | -                 | 421 |     |     | 533                | 567 | -   |     |
| Open  | H <sub>2</sub> | 400 <sup>sh</sup> | 423 |     |     | 516                | 550 | 592 | 648 |
|       | Zn             | 400 <sup>sh</sup> | 422 |     |     | 513                | 550 | -   |     |
|       | Ni             |                   | 417 |     |     | 529                | 562 |     |     |
|       | InCl           | 404 <sup>sh</sup> | 428 |     |     | 562                | 601 |     |     |
|       | Ir(CO)Cl       | -                 | 424 |     |     | 534                | 567 |     |     |
| Fused | H <sub>2</sub> | 386               | 418 | 452 | 480 | 568                | 617 | 643 | 709 |
|       | Zn             | 380               | 421 | 463 | 488 | 556                | 622 | -   | 672 |
|       | Ni             | 379               | -   | 460 | 486 | 550                | 586 |     | 672 |
|       | InCl           | 383               | 426 | 469 | 495 | 564                | 606 | -   | 688 |
|       | Ir(CO)Cl       | 378               | -   | 464 | 489 | 555                | 595 | -   | 672 |

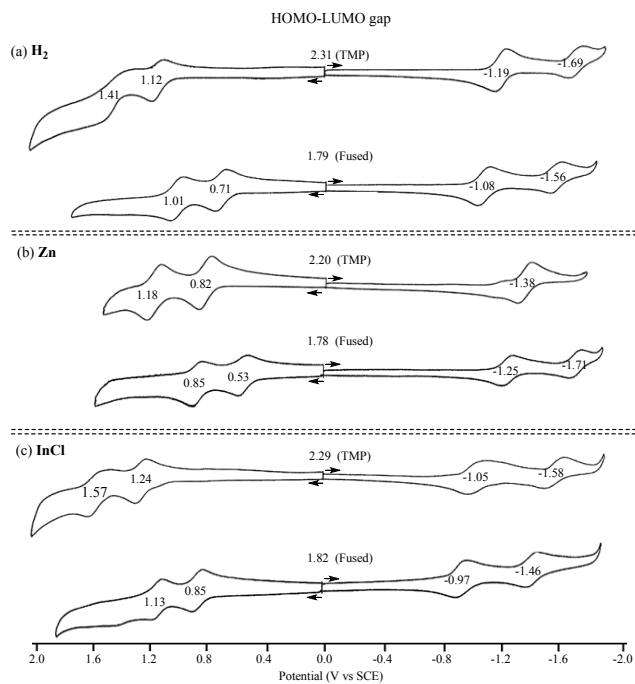

**Figure S3.** Cyclic voltammograms illustrating the reduction and oxidation of porphyrins with **TMP** and fused macrocycles in PhCN, 0.1 M TBAP. The  $\Delta E_{1/2}$  between the two reversible redox progresses (the HOMO-LUMO gap) is also given in the figure.

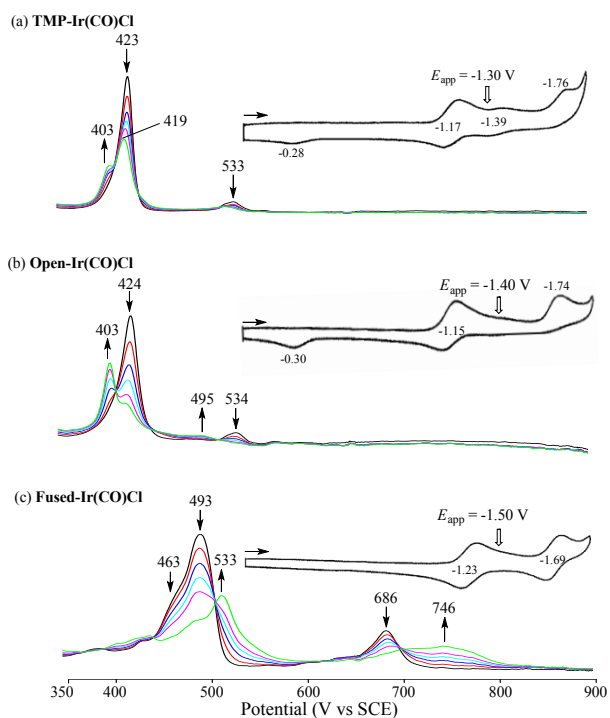

**Figure S4.** UV-visible spectral changes obtained during the first reduction of (a) **TMP-Ir(CO)Cl**, (b) **Open-Ir(CO)Cl** and (c) **Fused-Ir(CO)Cl** in PhCN, 0.1 M TBAP.

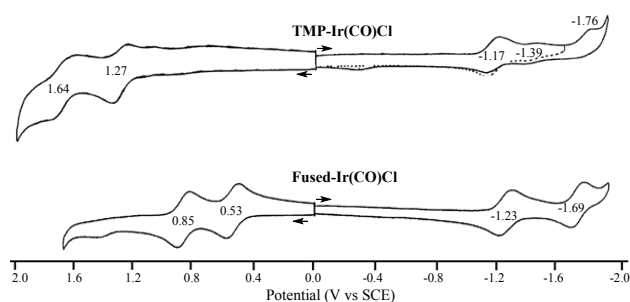

**Figure S5.** Cyclic voltammograms of **Ir(CO)Cl** centered orphyrins with **TMP** and **Fused** macrocycles in PhCN, 0.1 M TBAP.

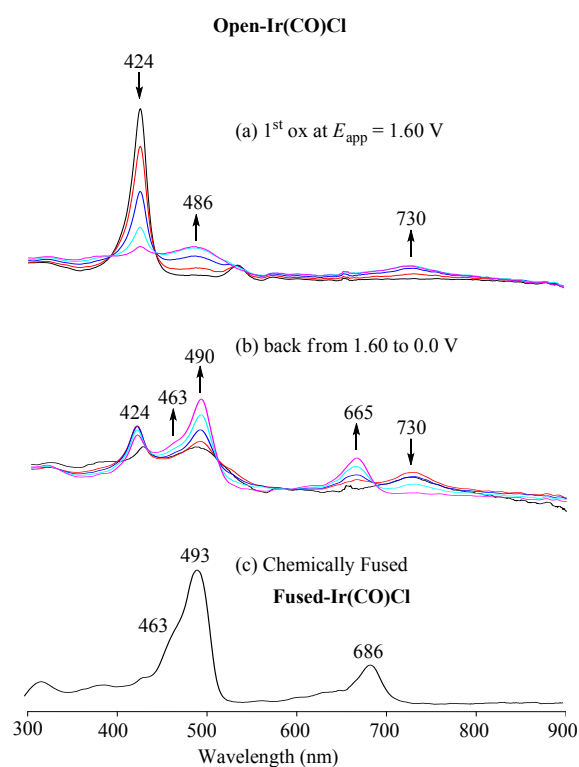

**Figure S6.** UV-visible spectral changes (a) during oxidation of **Open-Ir(CO)Cl** in a thin-layer cell at an applied potential of 1.60 V, (b) after re-reduction of the above compound at  $E_{app} = 0.00$  V to electrogenerate the neutral fused compounds in PhCN, 0.1 M TBAP and (c) UV-vis spectra of the chemically synthesized **Fused-Ir(CO)Cl** under the same solution condition.

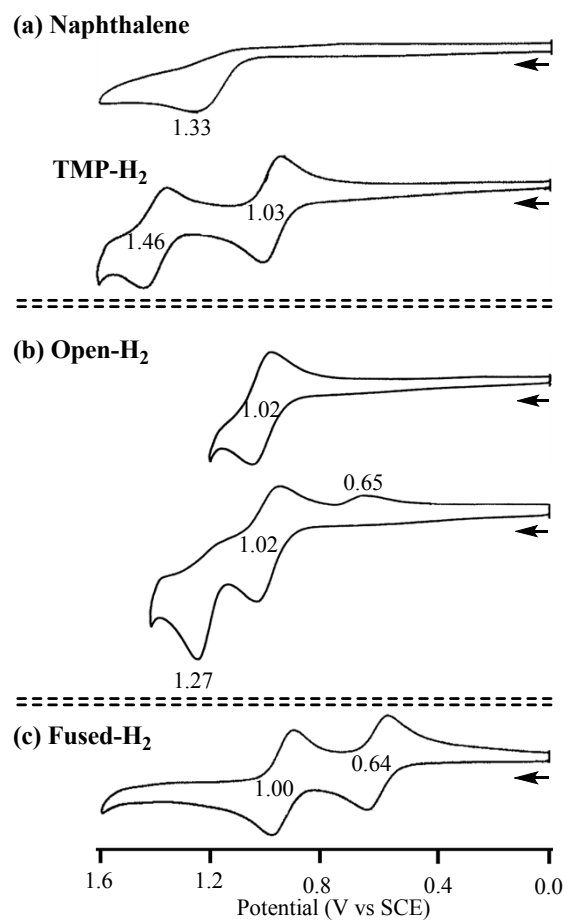

**Figure S7.** Cyclic voltammogram of (a) naphthalene and **TMP-H<sub>2</sub>**, (b) **Open-H<sub>2</sub>** and (c) **Fused-H<sub>2</sub>** in CH<sub>2</sub>Cl<sub>2</sub>, 0.1 M TBAP.

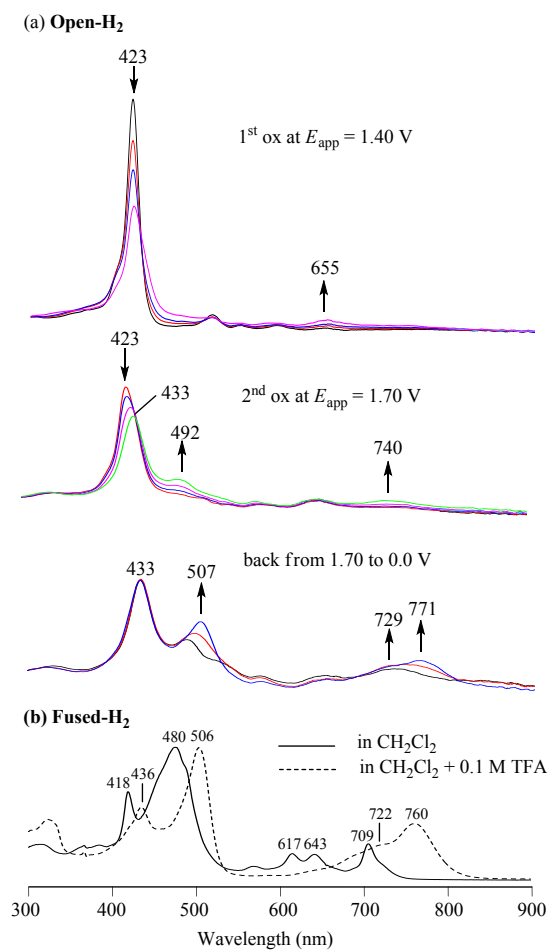

**Figure S8.** UV-visible spectrum of (a) **Open-H<sub>2</sub>** during oxidation and rereduction in CH<sub>2</sub>Cl<sub>2</sub>, 0.1 M TBAP and (b) **Fused-H<sub>2</sub>** before (—) and (-----) after addition of TFA in CH<sub>2</sub>Cl<sub>2</sub>.



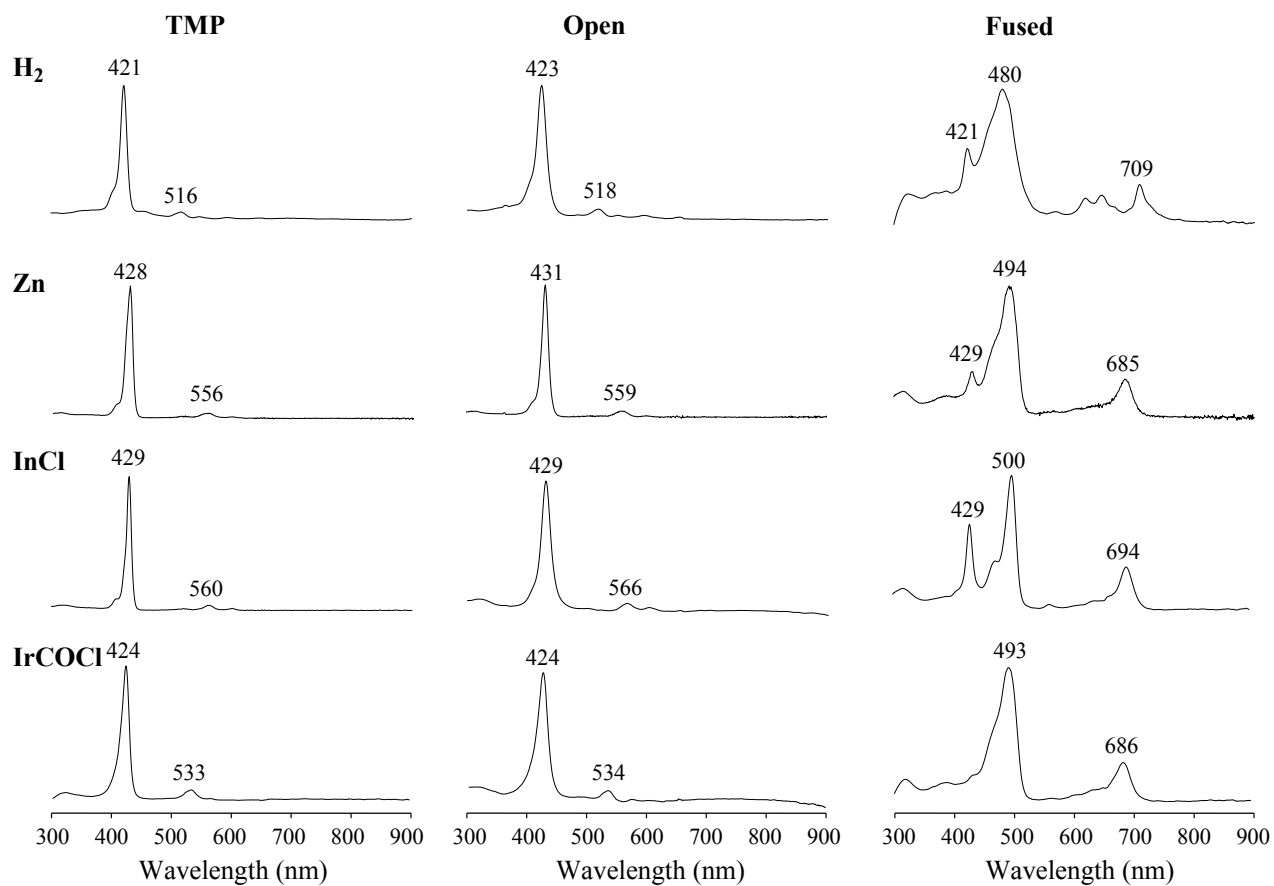

**Figure S9. UV-vis spectra of investigated porphyrins in PhCN, 0.1 M TBAP.**

**Figure S10. UV-vis titration of Fused-H<sub>2</sub> in CH<sub>2</sub>Cl<sub>2</sub> with TFA.**

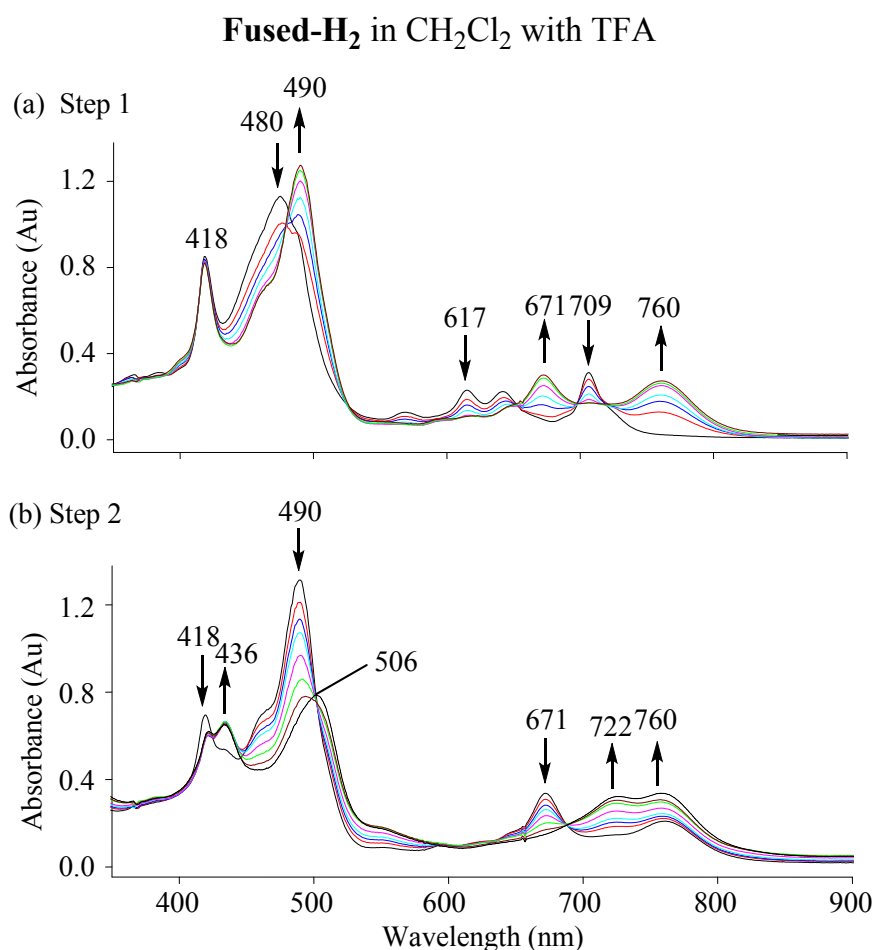

## EXPERIMENTAL SECTION

**Chemicals.** TMP-H<sub>2</sub>, Open-H<sub>2</sub>, Open-Zn, were prepared according to published procedures.[1] 1,6-dimethoxynaphthalene is commercially available.

Absolute dichloromethane (CH<sub>2</sub>Cl<sub>2</sub>, 99.8%, EMD Chemicals Inc.) was used for electrochemistry without further purification. Benzonitrile (PhCN) was purchased from Aldrich Chemical Co. and distilled over P<sub>2</sub>O<sub>5</sub> under vacuum prior to use. Tetra-*n*-butylammonium perchlorate (TBAP), used as supporting electrolyte, was purchased from Sigma Chemical or Fluka Chemika Co., recrystallized from ethyl alcohol, and dried under vacuum at 40 °C for at least one week prior to use.

All chemicals were purchased from Aldrich or Alfa Aesar and were used as received unless otherwise noted. Reagent grade solvents (CH<sub>2</sub>Cl<sub>2</sub>, hexanes) were distilled prior use. All reported NMR spectra were recorded on 400 or 500MHz spectrometer. UV-vis spectrum absorption were recorded in CH<sub>2</sub>Cl<sub>2</sub>. Chromatography was performed on silica (Kieselgel 60, 200 - 400 mesh). Dry column vacuum chromatography (DCVC) was performed on preparative thin-layer chromatography silica. Mass spectra were obtained via FD-MS or ESI-MS.

**Fused-H<sub>2</sub>. Method A:** Open-Zn (46 mg, 0.05 mmol) was dissolved in dry CH<sub>2</sub>Cl<sub>2</sub> (15 mL) and Fe(ClO<sub>4</sub>)<sub>3</sub>•H<sub>2</sub>O (195 mg, 0.5 mmol) in MeNO<sub>2</sub> was added *via* syringe within 5 min. After 25 minutes CF<sub>3</sub>OOH was added (2 mL) and stirred for additional 20 minutes. The reaction was filtered directly through a pad of silica. Additional DCVC (CH<sub>2</sub>Cl<sub>2</sub>:hexanes) gave pure product. Crystallization from CH<sub>2</sub>Cl<sub>2</sub>:hexanes afforded product as green crystals with 52% (22 mg); <sup>1</sup>H NMR (500 MHz, CDCl<sub>3</sub>, Me<sub>4</sub>Si): δH(ppm) = 9.37 (s, 1H), 9.02 (d, *J* = 3.8 Hz, 1H), 8.72 (d, *J* = 9.5 Hz, 1H), 8.63 (d, *J* = 4.5 Hz, 1H), 8.50 (d, *J* = 4.5 Hz, 1H), 8.48-8.46 (m, 2H), 8.42 (d, *J* = 4.5 Hz, 1H), 7.70 (d, *J* = 9.5 Hz, 1H), 7.42 (d, *J* = 9.5 Hz, 1H), 7.30-7.25 (m, 6H), 7.20-7.18 (m, 1H), 4.40 (s, 3H), 4.30 (s, 3H), 2.66 (s, 3H),

2.63 (s, 3H), 2.59 (s, 3H), 1.94 (s, 12H), 1.93 (s, 6H), -1.14 (br. s, 2H); UV-vis (CH<sub>2</sub>Cl<sub>2</sub>):  $\lambda_{\max}$  ( $\epsilon$ ) 475 (101 300), 570 (2 400), 615 (5 500), 641 nm (12 200); HRMS (ESI) [M+H]<sup>+</sup> [C<sub>59</sub>H<sub>53</sub>N<sub>4</sub>O<sub>2</sub>]<sup>+</sup>: calcd 849.4169, found 849.4169. **Method B:** Controlled-potential bulk electrolysis was carried out in a 10 ml CH<sub>2</sub>Cl<sub>2</sub> solution containing 0.1 M TBAP and **Open-H<sub>2</sub>** (5.37 mg, 0.0064 mmol). The controlled oxidizing potential was set at +1.50 V which was sufficient to generate the species [**Open-H<sub>2</sub>**]<sup>2+</sup> which was converted to [**Fused-H<sub>4</sub>**]<sup>4+</sup> in solution. The potential was held at +1.50 V for two hours and then switched to +0.0 V, which resulted in a conversion of [**Fused-H<sub>4</sub>**]<sup>4+</sup> to [**Fused-H<sub>4</sub>**]<sup>2+</sup>. The doubly protonated dication was converted to **Fused-H<sub>2</sub>** by adding dry Et<sub>3</sub>N (0.1 mL) in DCM (5 mL). After 15 min solvent was removed in vacuum and the residue was dissolved in CH<sub>2</sub>Cl<sub>2</sub>. The crude product was first purified by silica gel column chromatography, with a solvent mixture of hexanes and CH<sub>2</sub>Cl<sub>2</sub> (3:2) as eluent. Additional DCVC (CH<sub>2</sub>Cl<sub>2</sub>:hexanes) gave pure green solid product with 53% yield. The spectral data of product correlated to data obtained in **Method A**.

**TMP-Zn.** TMP-H<sub>2</sub> (32 mg, 0.04 mmol), Zn(OAc)<sub>2</sub>•H<sub>2</sub>O (700 mg, 4.00 mmol), and chloroform (30 mL) were placed in a round bottomed flask, stirred for 8 hours. Upon completion reaction of the solvent was removed in vacuum and the residue was dissolved in CH<sub>2</sub>Cl<sub>2</sub>. The crude product was purified by silica gel column chromatography, with a solvent mixture of hexanes and CH<sub>2</sub>Cl<sub>2</sub> (3:2) as eluent. Solvents were removed in vacuum to yield a red colored solid (33 mg, 98%); <sup>1</sup>H NMR (400 MHz, CDCl<sub>3</sub>, Me<sub>4</sub>Si):  $\delta$ H(ppm) = 8.67 (br s, 8H), 7.34 (s, 8H), 2.02 (s, 12H), 1.84 (s, 12H), 1.67 (s, 12H); UV-vis (CH<sub>2</sub>Cl<sub>2</sub>):  $\lambda_{\max}$  ( $\epsilon$ ) 371 (6, 000), 419 (67, 500), 514 (1, 800), 548 (2, 400), 649 nm (1, 700); LRMS (FD) calcd for C<sub>56</sub>H<sub>52</sub>N<sub>4</sub>Zn: calcd 844.35, found 844.30, isotope profiles agree.

**TMP-InCl.** TMP-H<sub>2</sub> (32 mg, 0.04 mmol), InCl<sub>3</sub> (88 mg, 0.40 mmol), sodium acetate (298 mg, 4.25 mmol), and glacial acetic acid (15 mL) were placed in a round bottomed flask, heated to 110 °C for 30 hours. Upon reaction completion, the solvent was removed in vacuum and the residue was dissolved in CH<sub>2</sub>Cl<sub>2</sub>. The crude product was extracted from saturated NaHCO<sub>3</sub>, organic phases washed with brine and dried over Na<sub>2</sub>SO<sub>4</sub>. Solvents were removed in vacuum to yield a green colored solid (15 mg, 48%); <sup>1</sup>H NMR (400 MHz, CDCl<sub>3</sub>, Me<sub>4</sub>Si):  $\delta$ H(ppm) = 8.82 (s, 8H), 7.28 (s, 8H), 2.65 (s, 12H), 1.99 (s, 12H), 1.73 (s, 12H); UV-vis (CH<sub>2</sub>Cl<sub>2</sub>):  $\lambda_{\max}$  ( $\epsilon$ ) 426 (445, 600), 561 (15, 900), 599 nm (5, 700); LRMS (FD) calcd for C<sub>56</sub>H<sub>52</sub>ClInN<sub>4</sub>: calcd 930.29, found 930.30, isotope profiles agree.

**TMP-Ir(CO)Cl.** TMP-H<sub>2</sub> (32 mg, 0.04 mmol), [Ir(COD)Cl]<sub>2</sub> (52 mg, 0.08 mmol) were added into xylene (30 mL), and the solution was refluxed for 4 days. The solution changed color from purple to red. The crude mixture was dried under high vacuum and purified by silica gel column chromatography, with a solvent mixture of hexanes and CH<sub>2</sub>Cl<sub>2</sub> (3:2) as eluent. A reddish purple solid (14 mg, 0.01 mmol, 62%) was obtained by recrystallization from CH<sub>2</sub>Cl<sub>2</sub>/CH<sub>3</sub>OH; <sup>1</sup>H NMR (400 MHz, CDCl<sub>3</sub>, Me<sub>4</sub>Si):  $\delta$ H(ppm) = 8.68 (s, 8H), 7.28 (s, 8H), 2.62 (s, 12H), 1.92 (s, 12H), 1.83 (s, 12H); UV-vis (CH<sub>2</sub>Cl<sub>2</sub>):  $\lambda_{\max}$  ( $\epsilon$ ) 423 (255 300), 534 (22 800), 567 nm (3000); LRMS (FD) calcd for C<sub>57</sub>H<sub>52</sub>ClIrN<sub>4</sub>O: calcd 1036.34, found 1036.30, isotope profiles agree.

**Open-Ir(CO)Cl.** Open-H<sub>2</sub> (20 mg, 0.02 mmol), [Ir(COD)Cl]<sub>2</sub> (26 mg, 0.04 mmol) were added into xylene (15 mL), and the solution was refluxed for 3 days. The solution changed color from purple to red. The crude mixture was dried under high vacuum and purified by silica gel column chromatography, with a solvent mixture of hexanes and CH<sub>2</sub>Cl<sub>2</sub> (3:2) as eluent. A reddish purple solid (14 mg, 0.01 mmol, 62%) was obtained by recrystallization from CH<sub>2</sub>Cl<sub>2</sub>/CH<sub>3</sub>OH; <sup>1</sup>H NMR (400 MHz, CDCl<sub>3</sub>, Me<sub>4</sub>Si):  $\delta$ H(ppm) = 8.60-8.71 (m, 8H), 8.52 (d, *J* = 7.6 Hz, 1H), 8.33 (d, *J* = 9.2 Hz, 1H), 7.20-7.35 (m, 8H), 6.01 (d, *J* = 2.8 Hz, 1H), 4.29 (s, 3H), 4.28 (s, 3H), 2.62 (s, 9H), 1.92 (s, 9H), 1.83 (s, 9H); UV-vis (CH<sub>2</sub>Cl<sub>2</sub>):  $\lambda_{\max}$  ( $\epsilon$ ) 421 (289 300), 533 (20 800), 563 nm (4100); LRMS (FD) calcd for C<sub>60</sub>H<sub>52</sub>ClIrN<sub>4</sub>O<sub>3</sub>: calcd 1104.33, found 1104.30, isotope profiles agree.

**Open-InCl.** Open-H<sub>2</sub> (24 mg, 0.04 mmol), InCl<sub>3</sub> (88 mg, 0.40 mmol), sodium acetate (298 mg, 4.25 mmol), and glacial acetic acid (15 mL) were placed in a round bottomed flask, heated to 110 °C for 24 hours. Upon reaction completion, the solvent was removed in vacuum and the residue was dissolved in CH<sub>2</sub>Cl<sub>2</sub>. The crude product was extracted from saturated NaHCO<sub>3</sub>, organic phases washed with brine and dried over Na<sub>2</sub>SO<sub>4</sub>. Solvents were removed in vacuum to yield a greenish colored solid (25 mg, 62%); <sup>1</sup>H NMR (400 MHz, CDCl<sub>3</sub>, Me<sub>4</sub>Si):  $\delta$ H(ppm) = 8.84-8.85 (m, 8H), 8.41 (d, *J* = 9.2 Hz, 1H), 8.28 (d, *J* = 8.2 Hz, 1H), 7.28-7.30 (m, 6H), 7.10-7.15 (m, 2H), 6.08 (d, *J* = 2.8 Hz, 1H), 4.29 (s, 3H), 4.28 (s, 3H), 2.64 (s, 3H), 2.62 (s, 6H), 1.97 (s, 6H), 1.93 (s, 6H), 1.90 (s, 6H); UV-vis (CH<sub>2</sub>Cl<sub>2</sub>):  $\lambda_{\max}$

( $\epsilon$ ) 427 (287, 000), 561 (16, 600), 602 nm (5, 100); LRMS (FD) calcd for  $C_{59}H_{52}ClInN_4O_2$ : calcd 998.20, found 998.20, isotope profiles agree.

**Fused-Zn.** Fused- $H_2$  (24 mg, 0.04 mmol),  $Zn(OAc)_2 \cdot H_2O$  (700 mg, 4.00 mmol), and chloroform (30 mL) were placed in a round bottomed flask, stirred for 8 hours. Upon reaction completion, the solvent was removed in vacuum and the residue was dissolved in  $CH_2Cl_2$ . The crude product was purified by silica gel column chromatography, with a solvent mixture of hexanes and  $CH_2Cl_2$  (3:2) as eluent. Solvents were removed in vacuum to yield a red colored solid (26 mg, 98%);  $^1H$  NMR (400 MHz,  $CDCl_3$ ,  $Me_4Si$ ):  $\delta H$ (ppm) = 9.42 (br s, 2H), 9.22 (d,  $J = 4.4$  Hz, 1H), 8.62 (d,  $J = 4.4$  Hz, 1H), 8.58 (d,  $J = 9.2$  Hz, 1H), 8.52-8.60 (m, 4H), 7.61 (d,  $J = 9.2$  Hz, 1H), 7.20-7.30 (m, 7H), 4.37 (s, 3H), 4.27 (s, 3H), 2.64 (s, 3H), 2.62 (s, 3H), 2.60 (s, 3H), 1.92 (br s, 12H), 1.89 (s, 6H); UV-vis ( $CH_2Cl_2$ ):  $\lambda_{max}$  ( $\epsilon$ ) 383 (18, 800), 421 (39, 500), 487 (87, 300), 550 (11, 900), 617 (7, 900), 668 (21, 900), 718 nm (7, 400); LRMS (FD) calcd for  $C_{59}H_{50}N_4O_2Zn$ : calcd 910.30, found 910.30, isotope profiles agree.

**Fused-InCl. Method C:** Fused- $H_2$  (12 mg, 0.02 mmol),  $InCl_3$  (44 mg, 0.20 mmol), sodium acetate (150 mg, 2.13 mmol), and glacial acetic acid (10 mL) were placed in a round bottomed flask, heated to 110 °C for 20 hours. Upon reaction completion, the solvent was removed in vacuum and the residue was dissolved in  $CH_2Cl_2$ . The crude product was extracted from saturated  $NaHCO_3$ , organic phases washed with brine and dried over  $Na_2SO_4$ . Solvents were removed in vacuum to yield a green colored solid (11 mg, 55%);  $^1H$  NMR (400 MHz,  $CDCl_3$ ,  $Me_4Si$ ):  $\delta H$ (ppm) = 9.45 (s, 2H), 9.10 (d,  $J = 3.2$  Hz, 1H), 8.95 (d,  $J = 4.4$  Hz, 1H), 8.70-8.78 (m, 4H), 8.58-8.65 (m, 2H), 7.72 (d,  $J = 9.2$  Hz, 1H), 7.51 (d,  $J = 8.4$  Hz, 1H), 7.40 (d,  $J = 9.4$  Hz, 1H), 7.19-7.25 (m, 4H), 4.40 (s, 3H), 4.30 (s, 3H), 2.67 (s, 3H), 2.65 (s, 3H), 2.63 (s, 3H), 1.98 (s, 12H), 1.93 (s, 6H); UV-vis (DCM):  $\lambda_{max}$  ( $\epsilon$ ) 385 (11, 800) 427 (50, 800), 470 (28, 700), 493 (62, 500), 563 (3, 300), 605 (3, 300), 633 (4, 600), 686 nm (19, 600); LRMS (FD) calcd for  $C_{59}H_{50}ClInN_4O_2$ : calcd 996.26, found 996.20, isotope profiles agree. **Method D:** Controlled-potential bulk electrolysis was carried out in a 5 ml  $CH_2Cl_2$  solution containing 0.1 M TBAP and **Open-InCl** (11.04 mg, 0.011 mmol). The controlled oxidizing potential was set at +1.60 V which was sufficient to generate the species which was converted to **Fused-InCl** in solution. The potential was held at +1.60 V for 2.5 hours and then switched to +0.0 V for two hours, which resulted in a conversion to **Fused-InCl**. The crude product was first purified by silica gel column chromatography, with a solvent mixture of hexanes and  $CH_2Cl_2$  (3:2) as eluent. Additional SEC column (toluene) and DCVC ( $CH_2Cl_2$ :hexanes) gave pure green solid product 5.2 mg with 47% yield. The spectral data of product correlated to data obtained in **Method C**.

**Fused-Ir(CO)Cl.** Fused- $H_2$  (12 mg, 0.02 mmol),  $[Ir(COD)Cl]_2$  (26 mg, 0.04 mmol) were added into xylene (15 mL), and the solution was refluxed for 4 days. The solution changed color from purple to red. The crude mixture was dried under high vacuum and purified by silica gel column chromatography, with a solvent mixture of hexanes and  $CH_2Cl_2$  (3:2) as eluent. A reddish solid (11 mg, 0.01 mmol, 52%) was obtained by recrystallization from  $CH_2Cl_2/CH_3OH$ ;  $^1H$  NMR (400 MHz,  $CDCl_3$ ,  $Me_4Si$ ):  $\delta H$ (ppm) = 9.41 (s, 2H), 9.32 (d,  $J = 5.2$  Hz, 1H), 9.20 (d,  $J = 5.2$  Hz, 1H), 8.75 (d,  $J = 8.4$  Hz, 1H), 8.67 (d,  $J = 8.2$  Hz, 1H), 8.52-8.57 (m, 4H), 7.71 (d,  $J = 9.2$  Hz, 1H), 7.43 (d,  $J = 8.4$  Hz, 1H), 7.35 (d,  $J = 3.6$  Hz, 1H), 7.21-7.28 (m, 4H), 4.37 (s, 3H), 4.28 (s, 3H), 2.65 (s, 3H), 2.63 (s, 3H), 2.61 (s, 3H), 2.25 (s, 3H), 2.19 (s, 3H), 1.93 (s, 3H), 1.86 (s, 3H), 1.67 (s, 3H), 1.57 (s, 3H); UV-vis ( $CH_2Cl_2$ ):  $\lambda_{max}$  ( $\epsilon$ ) 312 (25 400), 337 (17 200), 484 (123 600), 546 (6000), 583 (9000), 607 (1 200), 656 nm (4 500); LRMS (FD) calcd for  $C_{60}H_{50}ClIrN_4O_3$ : calcd 1102.32, found 1102.30, isotope profiles agree.

## INSTRUMENTATION

Cyclic voltammetry was carried out with an EG&G Model 173 potentiostat/galvanostat at room temperature. A homemade three-electrode electrochemistry cell was used and consisted of a platinum button or glassy carbon working electrode, a platinum wire counter electrode, and a saturated calomel reference electrode (SCE). The SCE was separated from the bulk of the solution by a fritted-glass bridge of low porosity which contained the solvent/supporting electrolyte mixture. All potentials are referenced to the SCE.

Thin-layer UV-visible spectroelectrochemical experiments were performed with a home-built thin-layer cell which has a light transparent platinum net working electrode. Potentials were applied and

monitored with an EG&G PAR Model 173 potentiostat. Time-resolved UV-visible spectra were recorded with a Hewlett-Packard Model 8453 diode array spectrophotometer. High purity N<sub>2</sub> from Trigas was used to deoxygenate the solution and kept over the solution during each electrochemical and spectroelectrochemical experiment.

Controlled potential electrolysis was performed with an EG&G PAR 173 Potential/Galvanostat. An "H" type cell with a fritted glass junction to separate the cathodic and anodic portions of the cell was used for bulk electrolysis. The working and counter electrodes were made from platinum gauze. The reference electrode was an SCE. The sample and solvent were transferred into the electrolysis cell under nitrogen. The solution was stirred during electrolysis using a Fisher magnetic stirrer.

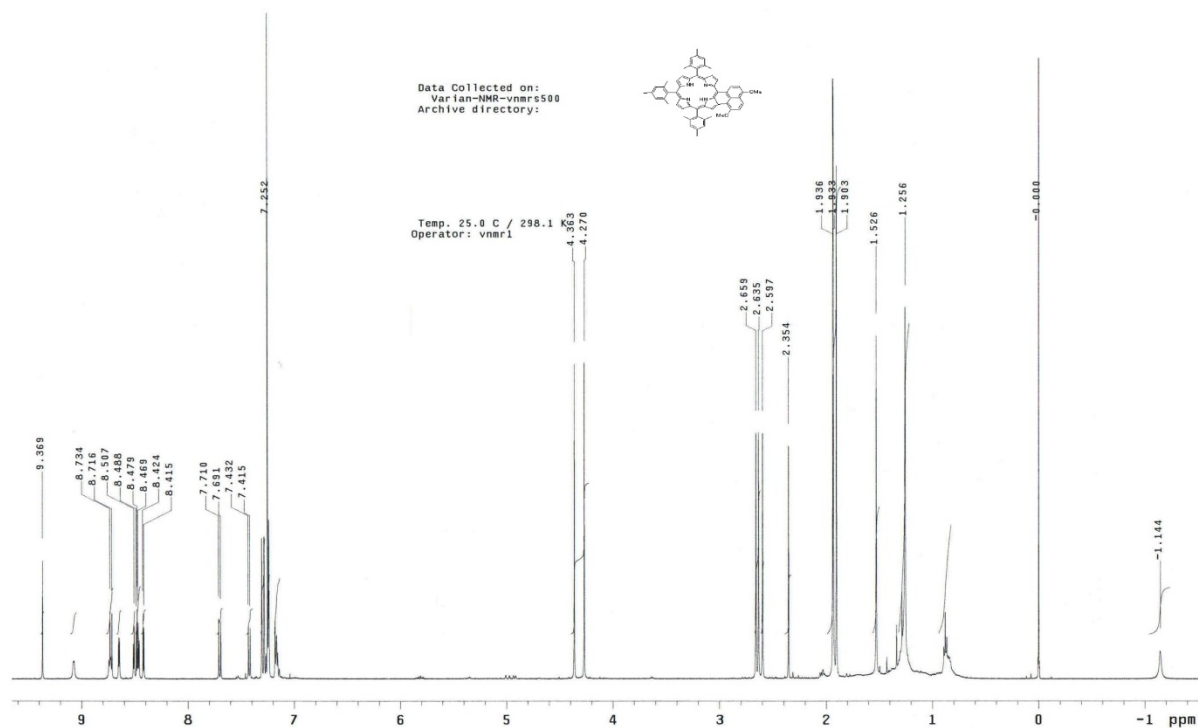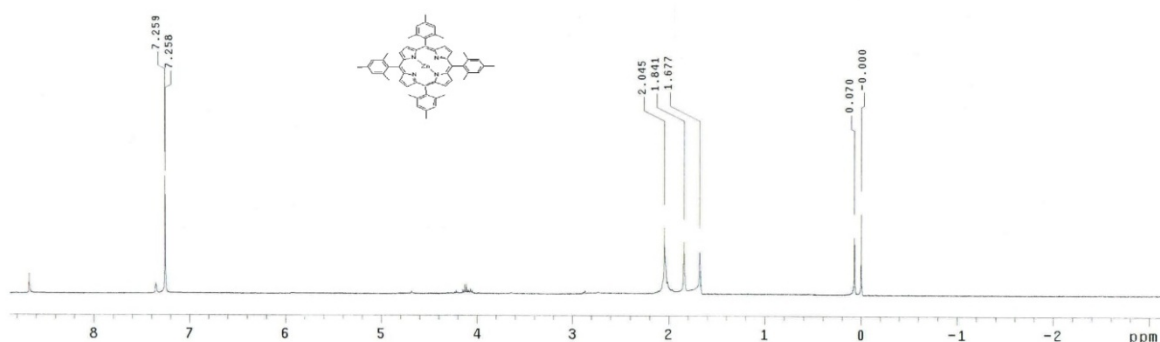

DK165  
Pulse Sequence: s2pu1  
Solvent: CDC13  
Ambient temperature  
Mercury-400BB "SchilfSUN"  
Relax. delay 1.000 sec  
Pulse 48.6 degrees  
Acq. time 3.630 sec  
Width 10000.0 Hz  
8 repetitions  
OBSERVE H1, 399.9812504 MHz  
DATA PROCESSING  
F1 size 131072  
Total time 0 min, 46 sec

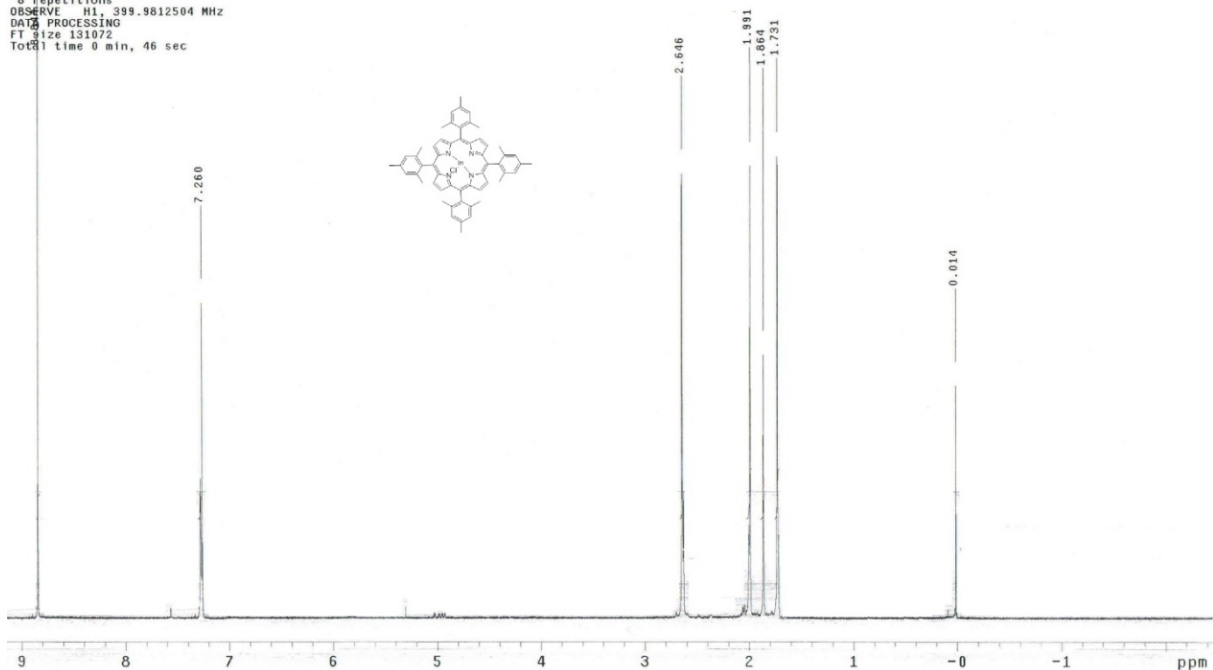

Solvent: CDC13  
Ambient temperature  
Mercury-400BB "SchilfSUN"  
Relax. delay 1.000 sec  
Pulse 48.6 degrees  
Acq. time 3.630 sec  
Width 10000.0 Hz  
8 repetitions  
OBSERVE H1, 399.9812504 MHz  
DATA PROCESSING  
F1 size 131072  
Total time 0 min, 46 sec

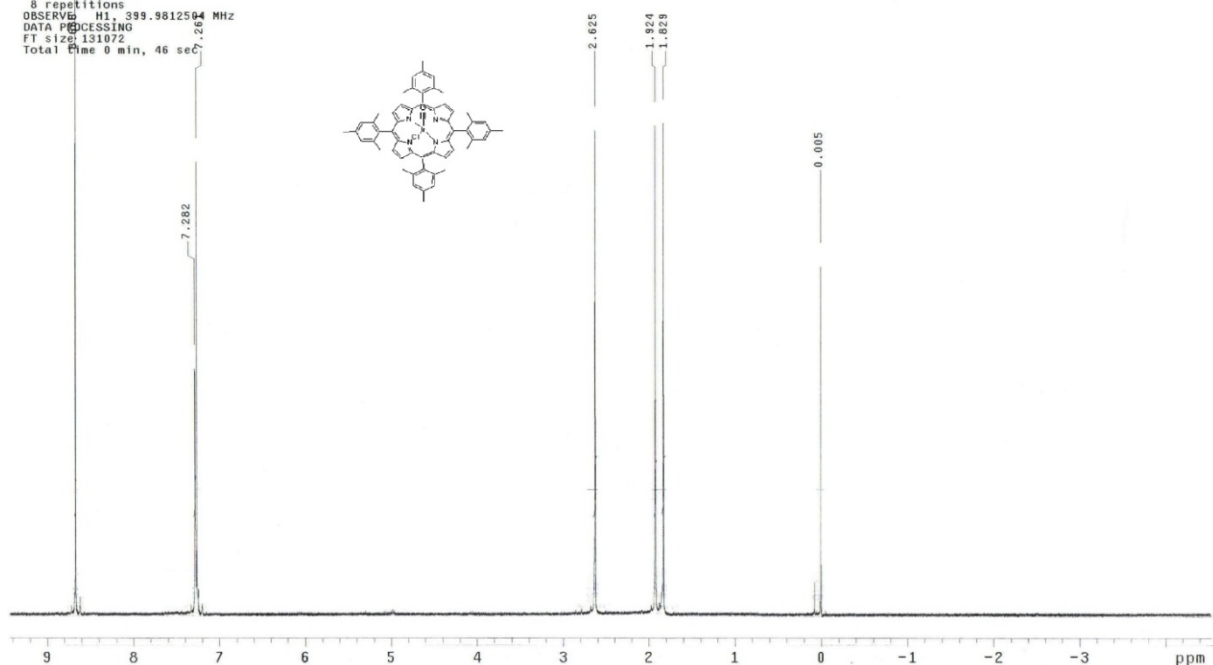

Solvent: CDCl3  
Ambient temperature  
Mercury-400BB "SchiffSUN"  
Relax. delay 1.000 sec  
Pulse 48.6 degrees  
Acq. time 3.550 sec  
Width 10000.0 Hz  
16 repetitions  
OBSERVE H1: 399.9812504 MHz  
DATA PROCESSING  
FT size 131072  
Total time 0 min, 0 sec

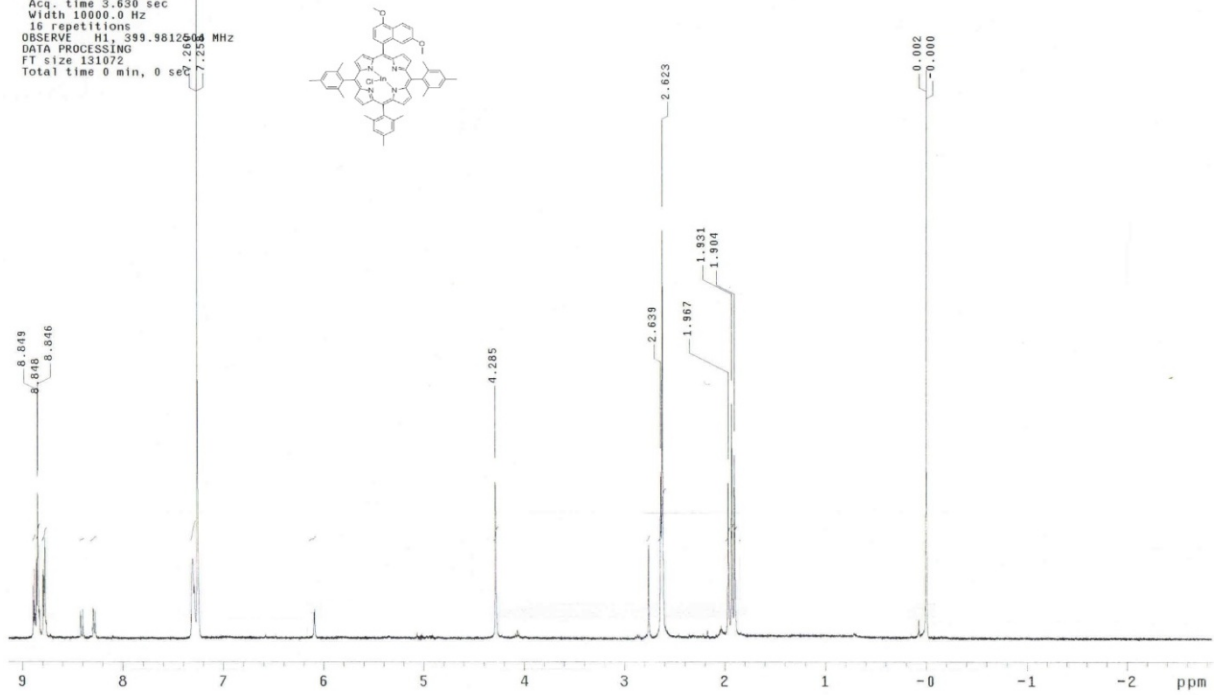

Solvent: CDCl3  
Ambient temperature  
Mercury-400BB "SchiffSUN"  
Relax. delay 1.000 sec  
Pulse 48.6 degrees  
Acq. time 3.630 sec  
Width 10000.0 Hz  
8 repetitions  
OBSERVE H1: 399.9816504 MHz  
DATA PROCESSING  
FT size 131072  
Total time 0 min, 46 sec

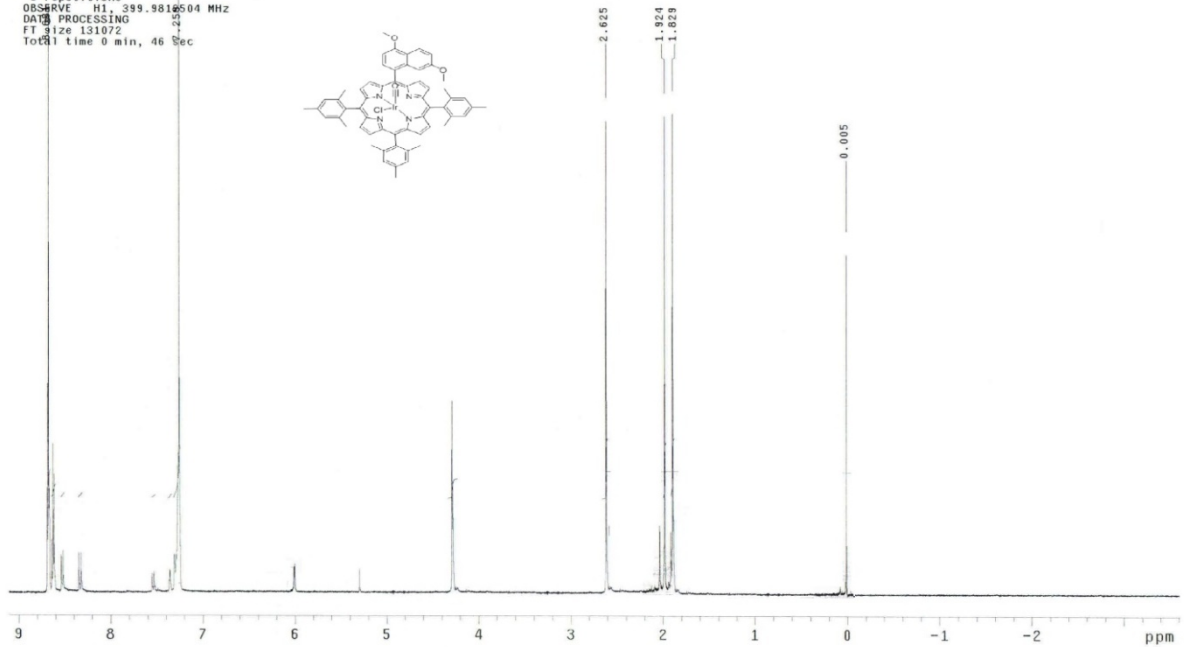

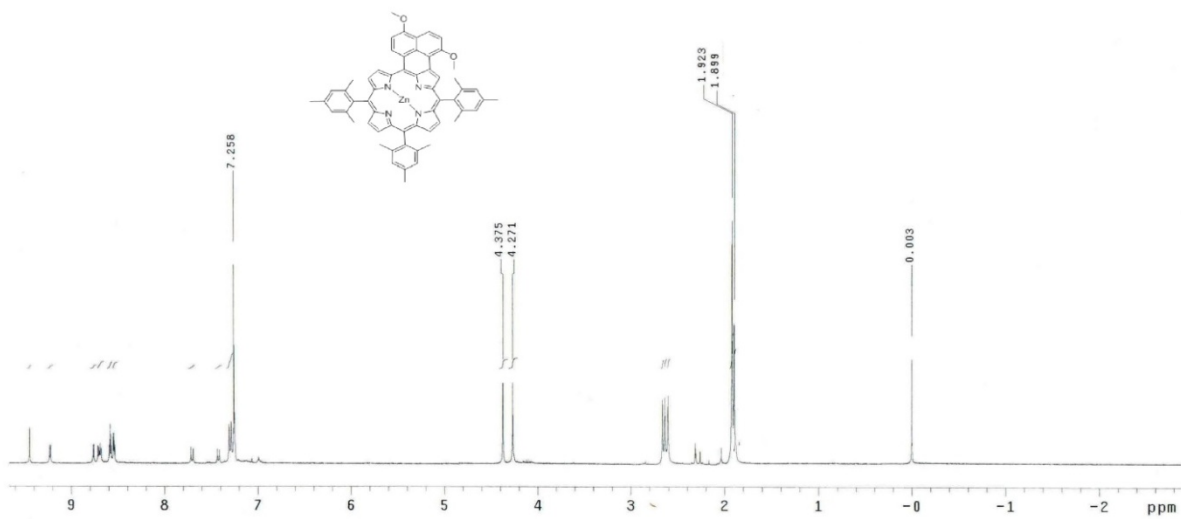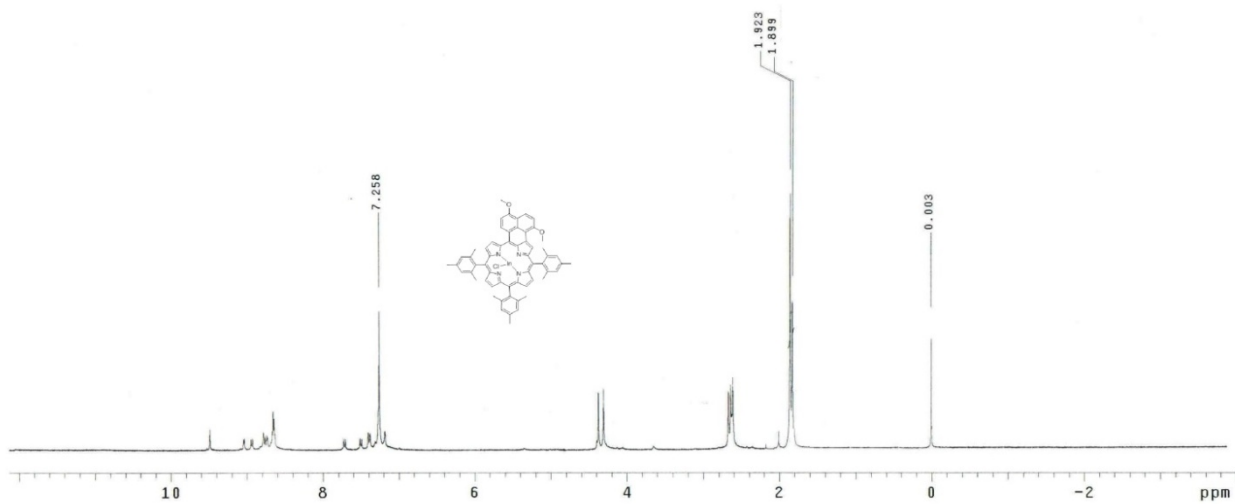



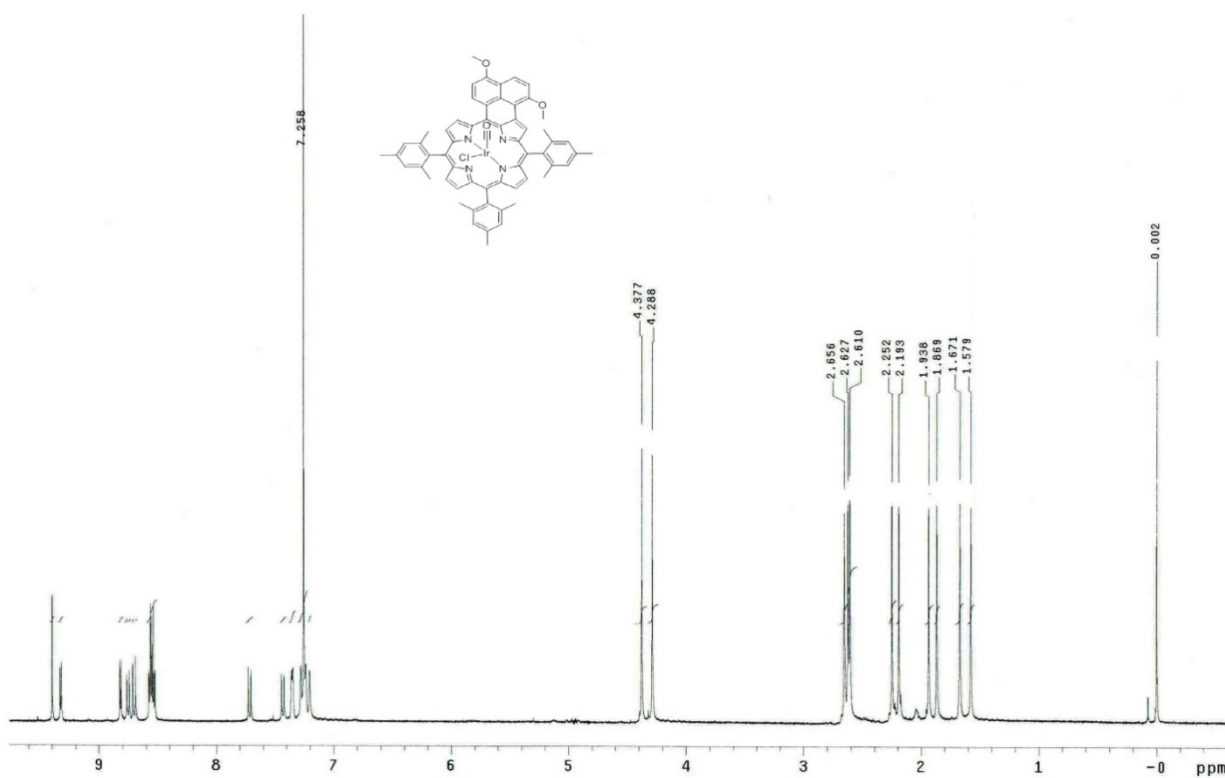

## LITERATURE

- [1] Lewtak, J. P.; Gryko, D.; Bao, D.; Sebai, E.; Vakuliuk, O.; Scigaj, M.; Gryko, D. T. *Org. Biomol. Chem.* 2011, **9**, 8178.
